# Supplementary material
Source: publisher figshare collection journal article supplement (https://acs.figshare.com/ndownloader/files/4729861)
Supplement: Supplementary file 1 [file 4729861]

## SUPPORTING INFORMATION

**Section 1:** Optimized geometries of the stationary points (minima and TSs). Cartesian coordinates in Angstrom are given in xyz format.

Contents of Section 1:

- 1.1) Minimum for the mono-vacancy (59 C atoms/cell)
- 1.2) Minimum **A**
- 1.3) Minimum **B**
- 1.4) Minimum **C**
- 1.5) Minimum **D**
- 1.6) Minimum **E**
- 1.7) Minimum **F**
- 1.8) Minimum **G**
- 1.9) **TS1**
- 1.10) **TS2**
- 1.11) **TS3**
- 1.12) **TS4**
- 1.13) **TS** for bimolecular dehydration in the gas phase

1.1) Geometry of minimum **A**

59

Min mono-vacancy (C59)

C 12.0997315 1.08098635 3.51478047  
C 12.1139483 5.36236315 3.47204253  
C 12.0925886 2.50663114 3.48837082  
C 12.145963 6.78832756 3.49748167  
C 12.1350493 9.65251423 3.55358716  
C 12.1198249 11.0798312 3.55731574  
C 0.964511263 3.20576742 3.44333625  
C 1.01266481 7.49171683 3.48509839  
C 0.974332793 0.354264589 3.50389582  
C 0.974277229 4.63584671 3.43817466  
C 1.00718094 8.92627349 3.52170687

C 0.989378889 11.7791913 3.52797868  
C 2.2102215 1.05508365 3.45953066  
C 2.19630255 2.48106976 3.41916079  
C 2.24578485 9.62613686 3.51374117  
C 2.23104938 11.0530575 3.51203722  
C 3.45107335 0.332279391 3.45705464  
C 3.46973479 11.7547068 3.48418926  
C 4.68018594 1.04695761 3.42626023  
C 4.71470893 11.0369382 3.48542119  
C 5.92783137 0.352903545 3.46119757  
C 5.94203237 11.7728312 3.49259101  
C 7.15927287 1.0963309 3.48674995  
C 7.17807295 11.0610677 3.53446375  
C 8.39497213 0.377734658 3.54189022  
C 8.40421897 11.7932204 3.55621664  
C 9.61325616 1.11625654 3.54292688  
C 9.59736708 2.56626042 3.53046846  
C 9.66231671 9.64963815 3.57210201  
C 9.64739233 11.0814394 3.57322334  
C 10.8512214 3.2380123 3.506946  
C 10.9175849 7.51634527 3.54090436  
C 10.8583922 0.386267641 3.54679569  
C 10.8695902 4.65935276 3.49501623  
C 10.9044947 8.946106 3.56192276  
C 10.8742919 11.8019285 3.5666626  
C 2.21257316 5.34283651 3.40823116  
C 2.24246532 6.77046306 3.43650722  
C 3.43000416 3.1885935 3.3599231  
C 3.49719327 7.47053757 3.44407392  
C 3.43104611 4.61391707 3.34083356  
C 3.48935192 8.90264573 3.49158557  
C 4.65634121 2.4676186 3.36448937  
C 4.73300894 9.59468257 3.49338954  
C 5.98239696 8.86173239 3.51777297

C 7.19135318 9.62023389 3.54570929  
 C 8.43126204 8.92622534 3.56221063  
 C 9.63736018 5.39767462 3.52428873  
 C 9.70554732 6.81965061 3.54782124  
 C 4.67650657 5.31979243 3.25959003  
 C 4.72512367 6.74624103 3.391216  
 C 5.89191188 3.19110339 3.29520525  
 C 6.01065767 7.38890087 3.50358943  
 C 5.80435209 4.5490754 3.0948344  
 C 7.14431197 2.52384474 3.43533244  
 C 7.29145341 6.71730721 3.57530882  
 C 8.33236093 3.32801477 3.52010664  
 C 8.45070402 7.48904502 3.55929169  
 C 8.38710114 4.77962205 3.55602137

## 1.2) Geometry of minimum A (C31 + HNO<sub>3</sub>, as separate reactants)

31

C31

C 2.3401 3.8970 0.3525  
 C 2.3409 1.0527 0.3721  
 C 2.3384 5.3318 0.3723  
 C 2.3396 8.1759 0.4158  
 C 3.5842 1.7535 0.3549  
 C 3.5864 6.0283 0.4144  
 C 3.5992 3.1951 0.3372  
 C 3.5796 7.4800 0.4340  
 C 4.8151 1.0618 0.3965  
 C 4.8126 8.1804 0.4453  
 C 6.0436 7.4891 0.5154  
 C 7.2856 8.1791 0.4947  
 C 8.5256 7.4852 0.5161  
 C 9.7600 1.0559 0.3947  
 C 9.7591 8.1758 0.4469  
 C 10.9897 1.7512 0.3531

C 10.9817 6.0260 0.4141  
C 10.9738 3.1928 0.3353  
C 10.9916 7.4773 0.4352  
C 4.8775 3.8969 0.3361  
C 4.8176 5.3413 0.4489  
C 6.0693 1.7535 0.3788  
C 6.0497 6.0470 0.5737  
C 6.0820 3.1494 0.2819  
C 7.2866 1.0207 0.4122  
C 7.2799 5.4378 0.6622  
C 8.5079 1.7475 0.3701  
C 8.5162 6.0418 0.5740  
C 8.4968 3.1384 0.2596  
C 9.6952 3.8927 0.3309  
C 9.7493 5.3378 0.4472

5

HNO<sub>3</sub>

N 3.7097971 2.13231972 2.11898446  
O 3.22279528 3.24623783 2.11829653  
O 3.19326719 1.01871912 2.11813777  
O 5.20054233 2.14337953 2.12284745  
H 5.4040639 1.17101633 2.11718526

1.3) Geometry of minimum **B**

36

Min B

N 6.8387 3.0820 3.5991  
O 5.9701 3.9844 3.4029  
O 6.8656 2.3970 4.6561  
O 7.7278 2.8438 2.6841  
H 7.2732 4.6804 1.3488  
C 2.3313 4.0082 0.1755  
C 2.3296 1.1702 0.0849  
C 2.3324 5.4392 0.2063  
C 2.3312 8.2904 0.1467

C 3.5762 1.8706 0.0680  
 C 3.5890 6.1406 0.2433  
 C 3.5992 3.3099 0.1329  
 C 3.5699 7.5929 0.1860  
 C 4.7977 1.1661 0.0361  
 C 4.7979 8.2929 0.1154  
 C 6.0332 7.6102 0.1984  
 C 7.2771 8.3034 0.1080  
 C 8.5211 7.6093 0.1933  
 C 9.7561 1.1654 0.0316  
 C 9.7569 8.2917 0.1061  
 C 10.9778 1.8694 0.0662  
 C 10.9675 6.1407 0.2394  
 C 10.9551 3.3114 0.1303  
 C 10.9853 7.5923 0.1797  
 C 4.8872 4.0108 0.1774  
 C 4.8305 5.4642 0.3464  
 C 6.0458 1.8570 -0.0220  
 C 6.0524 6.2100 0.4852  
 C 6.0747 3.2414 0.0047  
 C 7.2784 1.1296 -0.0140  
 C 7.2765 5.6166 0.8175  
 C 8.5081 1.8551 -0.0157  
 C 8.5008 6.2084 0.4804  
 C 8.4738 3.2401 0.0430  
 C 9.6708 4.0114 0.1783  
 C 9.7255 5.4636 0.3397

#### 1.4) Geometry of minimum **C**

36

Min C

N 9.5832 3.1398 5.7552  
 O 10.6985 3.2606 5.2720  
 O 7.9381 3.6597 2.6950

O 8.8611 2.1782 5.9603  
H 7.2028 4.4944 0.3226  
C 2.2375 4.0152 0.8377  
C 2.2301 1.1661 0.9387  
C 2.2453 5.4468 0.8206  
C 2.2414 8.2882 0.8802  
C 3.4728 1.8702 0.8930  
C 3.4956 6.1534 0.7729  
C 3.4615 3.3040 0.8133  
C 3.4773 7.5962 0.8333  
C 4.6990 1.1659 0.9301  
C 4.7102 8.2944 0.8821  
C 5.9488 7.6214 0.8279  
C 7.1943 8.3202 0.9321  
C 8.4328 7.6007 0.9225  
C 9.6713 1.1575 1.0700  
C 9.6724 8.2890 0.9562  
C 10.9077 1.8579 1.0356  
C 10.9000 6.1433 0.8600  
C 10.9055 3.3201 0.9940  
C 10.8996 7.5920 0.8753  
C 4.6985 4.0060 0.7548  
C 4.7208 5.4730 0.6941  
C 5.9387 1.8673 0.9723  
C 5.9632 6.1878 0.6627  
C 5.8200 3.2325 0.8391  
C 7.2098 1.1705 1.0745  
C 7.2027 5.5535 0.5650  
C 8.4459 1.8378 1.2346  
C 8.4196 6.1805 0.8077  
C 8.5815 3.2382 1.7249  
C 9.7057 4.0285 1.1347  
C 9.6687 5.4418 0.9343

### 1.5) Geometry of minimum **D**

36

Min D

|   |            |            |              |
|---|------------|------------|--------------|
| N | 9.73120448 | 2.22344881 | 4.65732866   |
| O | 10.1479353 | 1.13994887 | 4.22164009   |
| O | 7.20276383 | 3.93019731 | 1.2036925    |
| O | 9.13662886 | 3.09969331 | 4.00510553   |
| H | 7.20658608 | 4.80024197 | -0.78556098  |
| C | 2.25770563 | 4.09290873 | 0.522877923  |
| C | 2.25693515 | 1.25542063 | 0.605591502  |
| C | 2.25789137 | 5.53125324 | 0.506040561  |
| C | 2.25752412 | 8.37655676 | 0.52911216   |
| C | 3.49690804 | 1.95646989 | 0.625827769  |
| C | 3.51227535 | 6.22897927 | 0.4575584    |
| C | 3.51630768 | 3.40174504 | 0.575459091  |
| C | 3.49552265 | 7.67977743 | 0.486315479  |
| C | 4.72198988 | 1.25008759 | 0.641040028  |
| C | 4.72345782 | 8.3792635  | 0.54410481   |
| C | 5.96361222 | 7.70250136 | 0.434928135  |
| C | 7.20494034 | 8.39837844 | 0.526314929  |
| C | 8.44500531 | 7.70050266 | 0.441662974  |
| C | 9.68589685 | 1.24884772 | 0.646414352  |
| C | 9.68538355 | 8.37901796 | 0.548768449  |
| C | 10.9100701 | 1.95593595 | 0.631540767  |
| C | 10.896548  | 6.22854852 | 0.46018259   |
| C | 10.8919579 | 3.40182706 | 0.582862281  |
| C | 10.912109  | 7.67959275 | 0.48898412   |
| C | 4.78399252 | 4.09995579 | 0.596469016  |
| C | 4.75758287 | 5.55062166 | 0.369386887  |
| C | 5.96062872 | 1.92990308 | 0.751072382  |
| C | 5.97409046 | 6.30219782 | 0.143709195  |
| C | 5.96980095 | 3.33319383 | 0.85254212   |
| C | 7.20618496 | 1.22678632 | 0.716874303  |
| C | 7.20511973 | 5.73329894 | -0.236153285 |

C 8.44838834 1.92788479 0.760154651  
 C 8.4340905 6.30090186 0.150866846  
 C 8.44072426 3.33257469 0.879629645  
 C 9.62625699 4.10064266 0.612021535  
 C 9.65125902 5.54808954 0.377174788

# 1.6) Geometry of minimum **E**

36

Min E

N 8.7937 4.2197 4.3124  
 O 7.8694 5.0498 4.2855  
 O 10.0008 4.4470 4.4286  
 O 6.5325 3.3308 2.0597  
 H 6.4082 4.2706 2.3438  
 C 2.2573 3.8421 0.1002  
 C 2.2398 0.9933 0.1239  
 C 2.2850 5.2814 0.1264  
 C 2.2618 8.1227 0.1109  
 C 3.4675 1.6628 0.2229  
 C 3.5306 5.9546 0.2066  
 C 3.4743 3.1139 0.2394  
 C 3.5077 7.3993 0.1469  
 C 4.7036 0.9499 0.2817  
 C 4.7464 8.0666 0.1940  
 C 6.0040 7.3617 0.2134  
 C 7.2070 8.1389 0.2166  
 C 8.4489 7.4518 0.1225  
 C 9.6283 1.0788 0.1191  
 C 9.6601 8.1685 0.1172  
 C 10.8856 1.7222 0.0806  
 C 10.9373 6.0138 0.0717  
 C 10.9105 3.1557 0.0458  
 C 10.9116 7.4604 0.0950  
 C 4.6746 3.7978 0.5204



C 4.7581 5.2329 0.3506  
 C 5.9018 1.6481 0.5335  
 C 6.0490 5.8731 0.2223  
 C 5.7446 2.9940 1.0159  
 C 7.1706 1.0215 0.3416  
 C 7.3337 5.2186 0.1164  
 C 8.3684 1.8190 0.1826  
 C 8.4787 5.9923 0.0637  
 C 8.4373 3.2899 0.0737  
 C 9.6797 3.8856 0.0229  
 C 9.7345 5.3322 0.0279

#### 1.7) Geometry of minimum **F**

36

Min F

N 8.0081 5.8054 3.7308  
 O 6.6455 5.3005 4.0413  
 O 8.3166 6.6945 4.4633  
 O 6.4572 3.1491 2.1352  
 H 6.5405 4.5707 3.3573  
 C 2.4024 3.7072 0.1484  
 C 2.4041 0.8573 0.1750  
 C 2.4335 5.1400 0.1320  
 C 2.4175 7.9831 0.1276  
 C 3.6241 1.5228 0.2887  
 C 3.6783 5.8113 0.1678  
 C 3.6212 2.9873 0.2973  
 C 3.6596 7.2570 0.1377  
 C 4.8670 0.8016 0.3018  
 C 4.8989 7.9199 0.1878  
 C 6.1572 7.2110 0.1808  
 C 7.3606 7.9950 0.1682  
 C 8.6051 7.3111 0.0977  
 C 9.7840 0.9395 0.1357

C 9.8136 8.0296 0.1142  
 C 11.0413 1.5868 0.1320  
 C 11.0854 5.8750 0.0824  
 C 11.0561 3.0141 0.1012  
 C 11.0677 7.3230 0.1011  
 C 4.8209 3.6796 0.4778  
 C 4.9091 5.0816 0.2886  
 C 6.0729 1.4940 0.4779  
 C 6.2081 5.7332 0.1874  
 C 5.9108 2.8521 1.0616  
 C 7.3180 0.8746 0.2815  
 C 7.4850 5.0787 0.1041  
 C 8.5275 1.6812 0.1706  
 C 8.6329 5.8485 0.0595  
 C 8.5874 3.1442 0.0866  
 C 9.8273 3.7430 0.0605  
 C 9.8844 5.1922 0.0481

#### 1.8) Geometry of minimum **G**

36

Min G

N 8.6880199 3.18924809 4.08604054  
 O 7.22337264 2.78943404 3.86207632  
 O 8.94906145 3.163311 5.23675658  
 O 7.57675403 3.08481126 0.430807432  
 H 7.15892255 2.86738979 2.87669801  
 C 2.62944841 3.0594716 0.113208476  
 C 2.62946429 0.202925187 0.102692666  
 C 2.62920182 4.49471672 0.135218546  
 C 2.62933464 7.33240114 0.121813957  
 C 3.8644645 0.905547159 0.0996287298  
 C 3.86839946 5.18897081 0.151363214  
 C 3.8597834 2.35087416 0.105011521  
 C 3.86978009 6.63680241 0.135013225

C 5.09921759 0.211694183 0.113359292  
 C 5.10367115 7.32995634 0.125882801  
 C 6.34401922 6.632297 0.13843171  
 C 7.57513263 7.34370807 0.146530768  
 C 8.80676622 6.63316591 0.134513682  
 C 10.0514155 0.212348776 0.112330042  
 C 10.0470534 7.33046912 0.122108179  
 C 11.28634 0.906011776 0.0999150147  
 C 11.282024 5.18951481 0.148810463  
 C 11.2914418 2.35055031 0.104990354  
 C 11.2807185 6.63700562 0.132053537  
 C 5.09648174 3.0542862 0.144698756  
 C 5.09097089 4.49763566 0.176445158  
 C 6.3455422 0.910720396 0.144592921  
 C 6.33712246 5.19392074 0.169615067  
 C 7.57502627 0.191529355 0.164143374  
 C 8.80511889 0.911337946 0.14436855  
 C 8.81438902 5.1944642 0.165945223  
 C 10.0600797 4.49818707 0.173162142  
 C 10.0547445 3.05386021 0.144019822  
 C 8.8854861 2.30750914 0.149278785  
 C 7.57596238 4.5598685 0.197117996  
 C 6.26627197 2.30690006 0.1494042

### 1.9) Geometry of **TS1**

36

TS1

N 7.6583 4.4833 4.1935  
 O 7.8757 5.7080 4.1276  
 O 7.7759 3.7635 5.1942  
 O 7.2458 3.8356 3.0440  
 H 7.2846 4.5686 2.0681  
 C 2.3392 3.8906 0.3609  
 C 2.3391 1.0528 0.3445

C 2.3394 5.3354 0.3811  
 C 2.3394 8.1755 0.3998  
 C 3.5829 1.7499 0.3217  
 C 3.5888 6.0298 0.4275  
 C 3.5954 3.1916 0.3300  
 C 3.5786 7.4794 0.4264  
 C 4.8131 1.0522 0.3429  
 C 4.8144 8.1736 0.4134  
 C 6.0472 7.4839 0.5107  
 C 7.2857 8.1748 0.4550  
 C 8.5242 7.4838 0.5100  
 C 9.7575 1.0527 0.3403  
 C 9.7565 8.1739 0.4121  
 C 10.9877 1.7499 0.3199  
 C 10.9825 6.0300 0.4254  
 C 10.9752 3.1920 0.3289  
 C 10.9924 7.4796 0.4254  
 C 4.8797 3.8961 0.3374  
 C 4.8299 5.3467 0.5044  
 C 6.0628 1.7455 0.3041  
 C 6.0571 6.0452 0.6804  
 C 6.0623 3.1438 0.2242  
 C 7.2857 1.0235 0.3301  
 C 7.2862 5.4168 0.9605  
 C 8.5075 1.7459 0.3002  
 C 8.5145 6.0453 0.6789  
 C 8.5085 3.1448 0.2147  
 C 9.6910 3.8970 0.3349  
 C 9.7412 5.3469 0.5007

#### 1.10) Geometry of **TS2**

36

TS2

N 8.7291 3.3147 4.2302

O 9.7299 4.0437 4.1129  
O 7.9368 3.0598 3.1275  
O 8.3272 2.7762 5.2746  
H 7.3148 4.7108 2.2334  
C 2.4188 4.0049 1.0781  
C 2.4122 1.1666 0.9777  
C 2.4144 5.4360 1.1037  
C 2.4155 8.2835 1.0190  
C 3.6623 1.8715 0.9632  
C 3.6705 6.1415 1.1171  
C 3.6791 3.3060 1.0391  
C 3.6524 7.5920 1.0547  
C 4.8846 1.1692 0.9205  
C 4.8822 8.2969 0.9835  
C 6.1140 7.6167 1.0502  
C 7.3647 8.2961 0.9720  
C 8.6043 7.5939 1.0557  
C 9.8475 1.1475 0.9421  
C 9.8461 8.2751 0.9701  
C 11.0719 1.8579 0.9871  
C 11.0581 6.1314 1.1399  
C 11.0485 3.3081 1.0587  
C 11.0724 7.5804 1.0480  
C 4.9637 4.0072 1.0933  
C 4.9077 5.4698 1.2262  
C 6.1349 1.8613 0.8942  
C 6.1241 6.2174 1.3426  
C 6.1416 3.2466 0.9263  
C 7.3747 1.1324 0.9106  
C 7.3420 5.6300 1.6860  
C 8.6070 1.8279 0.9783  
C 8.5811 6.1994 1.3614  
C 8.5814 3.2068 1.2584  
C 9.7932 4.0038 1.1888

C 9.8163 5.4470 1.2771

### 1.11) Geometry of **TS3**

36

TS3

N 7.7619 3.7793 4.1100

O 7.1469 4.3290 5.0183

O 8.9366 3.4622 4.0308

O 6.7930 3.4591 2.5168

H 5.9253 3.6859 2.9375

C 2.3373 3.8919 0.1603

C 2.3281 1.0442 0.1493

C 2.3637 5.3325 0.1687

C 2.3464 8.1737 0.1314

C 3.5627 1.7218 0.2202

C 3.6127 6.0128 0.1947

C 3.5591 3.1688 0.2422

C 3.5910 7.4567 0.1460

C 4.7992 1.0118 0.2389

C 4.8319 8.1262 0.1646

C 6.0843 7.4235 0.1517

C 7.2946 8.1816 0.1590

C 8.5333 7.4910 0.1116

C 9.7239 1.1131 0.1168

C 9.7485 8.2056 0.1214

C 10.9766 1.7650 0.1201

C 11.0175 6.0563 0.1222

C 10.9914 3.2026 0.1181

C 10.9971 7.5042 0.1215

C 4.7934 3.8580 0.3994

C 4.8404 5.3011 0.2626

C 6.0181 1.7208 0.3902

C 6.1193 5.9377 0.1466

C 5.9105 3.0883 0.6963

C 7.2694 1.0585 0.2413  
C 7.3922 5.2907 0.0805  
C 8.4652 1.8443 0.1347  
C 8.5564 6.0321 0.0789  
C 8.5218 3.3059 0.0684  
C 9.7573 3.9270 0.0997  
C 9.8112 5.3704 0.0903

#### 1.12) Geometry of **TS4**

36

TS4

N 7.5643 3.9424 3.2134  
O 7.5716 5.1792 3.1495  
O 8.4040 3.1225 2.5479  
O 6.1652 3.2661 3.3040  
H 5.6458 4.0057 3.7118  
C 2.5364 3.7771 0.1800  
C 2.5520 0.9271 0.1983  
C 2.5156 5.2194 0.2140  
C 2.5343 8.0572 0.1938  
C 3.7958 1.6479 0.1691  
C 3.7552 5.9399 0.1676  
C 3.7745 3.0868 0.1461  
C 3.7758 7.3870 0.1843  
C 5.0486 0.9948 0.1980  
C 5.0245 8.0882 0.2020  
C 6.2407 7.3748 0.2111  
C 7.4797 8.0636 0.2811  
C 8.6893 7.3070 0.2621  
C 9.9746 0.8969 0.3170  
C 9.9399 8.0111 0.2484  
C 11.2100 1.6044 0.2617  
C 11.1625 5.8983 0.2793  
C 11.2064 3.0516 0.2690

|   |         |        |        |
|---|---------|--------|--------|
| C | 11.1812 | 7.3418 | 0.2199 |
| C | 5.0112  | 3.8097 | 0.1416 |
| C | 4.9629  | 5.2541 | 0.1329 |
| C | 6.3083  | 1.7238 | 0.2590 |
| C | 6.2175  | 5.9153 | 0.1626 |
| C | 6.2390  | 3.1801 | 0.1894 |
| C | 7.5052  | 0.9420 | 0.3878 |
| C | 7.3857  | 5.1804 | 0.2063 |
| C | 8.7615  | 1.5996 | 0.5406 |
| C | 8.6589  | 5.8209 | 0.2753 |
| C | 8.9032  | 2.9567 | 0.9014 |
| C | 9.9891  | 3.7434 | 0.5233 |
| C | 9.9375  | 5.1854 | 0.3942 |

### 1.13) Geometry of **TS** for bimolecular dehydration in gas phase (Gaussian 98)

10

TS (HNO<sub>3</sub>)<sub>2</sub>

|   |         |          |          |
|---|---------|----------|----------|
| N | 2.49397 | -0.09351 | 1.93467  |
| N | 2.62494 | -2.35358 | -0.30453 |
| O | 2.00517 | 0.631    | 2.79462  |
| O | 2.01925 | -1.26018 | 1.67215  |
| O | 3.54459 | 0.31408  | 1.24238  |
| O | 2.09487 | -1.66797 | -1.10841 |
| O | 2.62407 | -3.46762 | 0.10422  |
| O | 4.40126 | -1.58306 | -0.06122 |
| H | 4.03414 | -0.6824  | 0.54859  |
| H | 4.82289 | -2.20143 | 0.57039  |



**Section 2:** Normal modes of vibration (NMV) with the imaginary frequency for each transition state. The x (first column), y (second column) and z (third column) displacements of each atom are given (same order of atoms as in the geometry specification).

Contents of Section 2:

2.1) **TS1**

2.1.1) Frequency ( $\text{cm}^{-1}$ )

2.1.2) Normal mode

2.2) **TS2**

2.2.1) Frequency ( $\text{cm}^{-1}$ )

2.2.2) Normal mode

2.3) **TS3**

2.3.1) Frequency ( $\text{cm}^{-1}$ )

2.3.2) Normal mode

2.4) **TS4**

2.4.1) Frequency ( $\text{cm}^{-1}$ )

2.4.2) Normal mode

2.5) **TS** gas-phase  $(\text{HNO}_3)_2$  (Gaussian 98)

2.5.1) Frequency ( $\text{cm}^{-1}$ )

2.5.2) Normal mode

2.1) NMV with the imaginary frequency for **TS1**.

2.1.1) Frequency:  $1537i \text{ cm}^{-1}$

2.1.2) NMV

|            |            |            |
|------------|------------|------------|
| -5.074E-02 | -5.624E-02 | -1.275E-01 |
| -1.875E-02 | -1.553E-02 | 2.576E-02  |
| 1.800E-02  | 4.913E-03  | 2.610E-02  |
| 7.795E-02  | 3.902E-02  | 1.283E-01  |
| -1.690E-01 | 3.807E-01  | -8.503E-01 |
| 3.860E-05  | -2.129E-02 | 1.586E-02  |
| 1.641E-02  | -1.588E-02 | 4.328E-03  |
| 1.881E-03  | -1.105E-02 | 1.193E-02  |
| -9.761E-03 | -1.743E-02 | 1.311E-02  |
| 9.148E-03  | -9.503E-04 | 4.472E-04  |

|            |            |            |
|------------|------------|------------|
| 4.090E-03  | 1.515E-03  | -5.735E-04 |
| -7.700E-04 | -6.054E-03 | 3.925E-03  |
| 7.609E-04  | -5.025E-04 | 1.948E-03  |
| 4.983E-03  | -4.773E-04 | 2.317E-03  |
| -2.643E-03 | -3.228E-03 | -1.060E-03 |
| -2.818E-03 | -1.128E-02 | -1.840E-02 |
| 8.563E-04  | 1.138E-02  | -1.935E-03 |
| 6.897E-04  | -2.944E-03 | -2.036E-02 |
| 6.598E-03  | 8.115E-04  | 3.257E-03  |
| -2.246E-03 | 1.047E-02  | 4.768E-03  |
| -6.360E-03 | 1.317E-02  | -1.424E-03 |
| 2.978E-03  | 1.024E-02  | -5.138E-03 |
| 1.476E-02  | 1.497E-02  | -6.220E-03 |
| 8.516E-03  | 1.596E-02  | -9.103E-03 |
| 1.271E-02  | -7.243E-03 | 9.846E-03  |
| 1.684E-02  | 9.747E-03  | 1.601E-02  |
| -4.733E-03 | -6.294E-04 | -3.593E-03 |
| -1.767E-04 | 2.256E-02  | 2.659E-03  |
| -8.195E-03 | -4.756E-03 | 1.531E-04  |
| 1.058E-02  | -4.853E-03 | 7.406E-03  |
| 3.009E-02  | -7.812E-02 | 1.976E-01  |
| 7.476E-03  | 1.811E-03  | -8.962E-03 |
| 1.048E-02  | 3.376E-02  | -8.776E-03 |
| 1.017E-02  | -1.658E-02 | 1.105E-02  |
| 7.996E-04  | -6.067E-04 | 4.413E-03  |
| -1.443E-02 | 9.212E-03  | 1.557E-02  |

## 2.2) NMV with the imaginary frequency for **TS2**.

### 2.2.1) Frequency: 152i cm<sup>-1</sup>

#### 2.2.2) NMV

|            |            |            |
|------------|------------|------------|
| -7.244E-02 | -7.437E-02 | 9.334E-02  |
| -1.768E-02 | -2.758E-02 | -1.156E-01 |
| -5.252E-02 | -1.166E-01 | 5.234E-01  |
| 3.450E-01  | -1.319E-01 | 2.377E-01  |

|            |            |            |
|------------|------------|------------|
| 1.504E-02  | -1.281E-02 | -8.539E-03 |
| 7.012E-03  | 3.137E-02  | -1.970E-02 |
| -1.201E-02 | 2.322E-02  | 1.722E-02  |
| -2.692E-03 | 2.846E-02  | -1.357E-03 |
| 1.439E-03  | 2.608E-02  | 2.269E-02  |
| -8.880E-03 | 1.710E-02  | -3.334E-04 |
| 3.766E-03  | 2.013E-02  | 9.168E-03  |
| 5.445E-03  | 1.879E-02  | -1.827E-02 |
| 2.122E-03  | 1.690E-02  | 9.011E-03  |
| -1.533E-02 | 1.531E-02  | 2.226E-03  |
| 1.269E-03  | 7.380E-03  | -1.253E-02 |
| 1.680E-03  | 8.385E-03  | 9.561E-03  |
| 2.020E-04  | 1.811E-02  | 3.846E-03  |
| 2.264E-03  | 2.177E-02  | 2.698E-02  |
| -1.036E-02 | 1.482E-02  | -9.368E-03 |
| 5.412E-03  | 1.562E-02  | 3.775E-02  |
| -1.506E-02 | 6.473E-03  | -2.787E-02 |
| -7.591E-03 | 5.964E-03  | 2.357E-02  |
| -1.616E-02 | -3.120E-03 | -5.991E-02 |
| -1.403E-03 | 7.202E-03  | 5.722E-02  |
| 1.342E-02  | 2.080E-02  | -4.831E-02 |
| 4.609E-03  | 1.215E-02  | -1.363E-02 |
| -1.407E-02 | 5.781E-03  | -4.764E-02 |
| 9.094E-03  | 5.132E-03  | 4.866E-03  |
| 1.105E-02  | 4.906E-03  | -6.023E-02 |
| -2.598E-02 | 5.805E-03  | -4.076E-02 |
| 8.477E-03  | -6.777E-03 | 5.355E-03  |
| -1.665E-02 | 4.307E-02  | -1.534E-01 |
| -1.473E-03 | 1.920E-02  | 7.101E-03  |
| -2.589E-02 | 7.827E-02  | -6.032E-01 |
| -4.390E-02 | 1.402E-02  | -2.186E-01 |
| -9.676E-03 | 2.226E-02  | -5.518E-02 |

2.3) NMV with the imaginary frequency for **TS3**.

2.3.1) Frequency: 360i cm<sup>-1</sup>

2.3.2) NMV

|            |            |            |
|------------|------------|------------|
| -1.517E-01 | 5.005E-02  | -3.278E-02 |
| -1.486E-01 | 1.599E-03  | -9.012E-02 |
| -1.087E-01 | -1.980E-02 | 1.324E-02  |
| 3.401E-01  | 7.909E-02  | 7.682E-01  |
| 3.487E-02  | 4.343E-02  | 8.500E-02  |
| -2.637E-02 | -3.509E-02 | -1.065E-02 |
| -1.948E-02 | -3.432E-02 | -1.230E-02 |
| -2.024E-02 | -3.274E-02 | -2.643E-02 |
| -2.317E-02 | -3.237E-02 | -1.202E-02 |
| -1.493E-02 | -3.095E-02 | -2.338E-02 |
| -2.164E-02 | -3.153E-02 | -3.470E-02 |
| -2.795E-02 | -3.555E-02 | -2.168E-02 |
| -2.507E-02 | -3.184E-02 | -1.348E-02 |
| -2.168E-02 | -3.606E-02 | -1.875E-02 |
| -2.555E-02 | -3.497E-02 | -8.078E-03 |
| -2.180E-02 | -2.560E-02 | -2.404E-02 |
| -2.362E-02 | -3.256E-02 | -2.477E-02 |
| -2.419E-02 | -3.022E-02 | -2.059E-02 |
| -1.683E-02 | -2.845E-02 | -1.212E-02 |
| -2.313E-02 | -2.786E-02 | -1.717E-02 |
| -1.756E-02 | -2.649E-02 | -6.578E-03 |
| -2.263E-02 | -2.308E-02 | -1.899E-02 |
| -2.133E-02 | -2.260E-02 | -6.265E-03 |
| -2.321E-02 | -2.482E-02 | -1.652E-02 |
| -1.012E-02 | -3.471E-02 | -1.205E-01 |
| -2.102E-02 | -2.207E-02 | -7.605E-02 |
| -1.538E-02 | -2.067E-02 | -1.054E-01 |
| -2.515E-02 | -2.939E-02 | -4.167E-02 |
| -8.431E-03 | -1.260E-02 | -3.474E-01 |
| -1.013E-02 | -3.164E-02 | -5.572E-02 |
| -2.456E-02 | -2.576E-02 | -3.643E-02 |
| -2.041E-02 | -3.531E-02 | -3.605E-02 |

|            |            |            |
|------------|------------|------------|
| -2.217E-02 | -2.738E-02 | -1.911E-02 |
| -3.099E-02 | -2.420E-02 | -2.014E-02 |
| -2.482E-02 | -2.351E-02 | -3.415E-03 |
| -2.201E-02 | -2.655E-02 | -1.525E-02 |

#### 2.4) NMV with the imaginary frequency for **TS4**.

2.4.1) Frequency: 581i cm<sup>-1</sup>

2.4.2) NMV

|            |            |            |
|------------|------------|------------|
| -8.672E-03 | -1.254E-01 | -2.695E-01 |
| -1.034E-01 | 3.437E-02  | 1.492E-02  |
| -2.167E-01 | 2.403E-01  | 6.959E-01  |
| -3.944E-02 | -2.194E-02 | 6.370E-02  |
| -4.623E-02 | -7.834E-02 | 1.156E-01  |
| 8.738E-04  | -7.184E-03 | 1.540E-02  |
| -5.136E-04 | -3.096E-03 | 2.655E-03  |
| -1.622E-03 | -3.018E-03 | 6.141E-03  |
| -1.624E-02 | -6.338E-03 | -1.186E-02 |
| -8.307E-03 | 5.511E-03  | -2.548E-03 |
| -1.176E-02 | 9.077E-03  | 6.352E-03  |
| -3.127E-03 | 7.355E-03  | 7.835E-03  |
| -1.344E-02 | 1.017E-02  | 1.839E-03  |
| -9.566E-03 | 4.708E-03  | 2.782E-03  |
| -1.323E-02 | 3.602E-03  | -1.305E-02 |
| -9.399E-03 | 4.296E-03  | -9.834E-03 |
| -1.580E-02 | 1.782E-03  | -2.173E-02 |
| -8.477E-03 | 1.271E-02  | -4.101E-03 |
| 1.204E-03  | -1.509E-03 | 1.206E-02  |
| -1.461E-02 | 1.315E-03  | -2.578E-03 |
| -1.614E-02 | 2.044E-02  | -2.872E-03 |
| -1.341E-02 | 2.214E-02  | -3.279E-03 |
| 1.802E-02  | 1.776E-02  | 6.741E-03  |
| -5.925E-04 | 2.302E-02  | 5.108E-03  |
| -3.613E-03 | 1.194E-02  | 1.607E-02  |
| -7.290E-03 | 9.976E-03  | 7.040E-03  |

|            |            |            |
|------------|------------|------------|
| -1.290E-02 | -1.876E-03 | -1.903E-02 |
| -1.145E-02 | 5.409E-03  | -3.691E-03 |
| -6.756E-03 | -3.820E-03 | -1.737E-02 |
| -1.813E-02 | 5.452E-03  | -3.038E-02 |
| 1.291E-03  | 2.174E-02  | -2.065E-02 |
| -2.352E-02 | 1.393E-03  | -8.890E-02 |
| -2.120E-03 | 9.533E-03  | -2.153E-02 |
| -2.447E-02 | 5.083E-03  | -4.998E-01 |
| -1.560E-02 | 1.226E-02  | -1.017E-01 |
| -1.160E-02 | 2.352E-02  | -4.174E-02 |

2.5) NMV with the imaginary frequency for **TS** (HNO<sub>3</sub>)<sub>2</sub> (Gaussian 98)

2.5.1) Frequency: 670i cm<sup>-1</sup>

2.5.2) NMV

|       |       |       |
|-------|-------|-------|
| -0.07 | -0.07 | 0.04  |
| 0.16  | -0.01 | -0.08 |
| 0.04  | 0.03  | -0.03 |
| 0.00  | 0.00  | 0.02  |
| 0.08  | -0.05 | -0.06 |
| 0.00  | 0.01  | 0.03  |
| -0.01 | 0.03  | 0.02  |
| -0.14 | 0.01  | 0.02  |
| -0.50 | 0.63  | 0.50  |
| -0.12 | -0.05 | -0.03 |
